# Supplementary material
Source: ML conference proceedings conference paper supplement (https://proceedings.mlr.press/v32/levine14.html)
Supplement: Supplementary file 2 [file levine14-supp.zip]

Archive with 5 entries (5 files):
- readme.txt
- video1.mp4
- video2.mp4
- video3.mp4
- supplement.pdf
